# Supplementary material for: miR-25-3p, Positively Regulated by Transcription Factor AP-2α, Regulates the Metabolism of C2C12 Cells by Targeting Akt1
Source: PubMed Central journal article supplement (PMC5877634; doi:10.3390/ijms19030773), 2018-03-08
Supplement: ijms-19-00773-s001.pdf [file ijms-19-00773-s001.pdf]

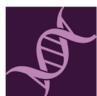

Supplementary Materials

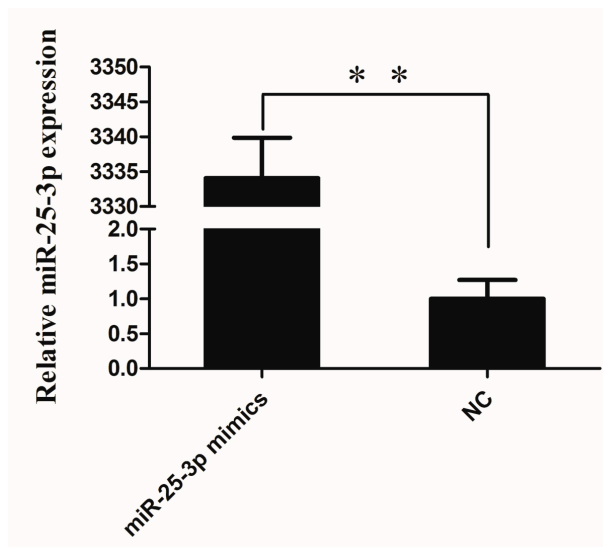

**Figure S1.** The mRNA expression of miR-25-3p was detected by qRT-PCR. NC, negative control (miR-239b-5p of caenorhabditis elegans). Data were presented as means ± SD ( $n = 3$ ), \*\*  $p < 0.01$ .

■ AliBaba2.1

```
seq( 1860.. 1919)   tagctgagcgccccaggctccatttgtttgatggggagcctagtggagttcagaagggtc
Segment s:
2.3.1.0   1854 1863   1===
2.3.1.0   1867 1877   ===YY1===
1.6.1.0   1868 1877   =AP-2alph=
2.3.2.3   1868 1877   ===BRF1===
1.1.3.0   1882 1891   =C/EBPalp=
1.6.1.0   1890 1899   =AP-2alph=
```

■ Genomatix

| Matrix                             | Start position | End position | Core sim. | Matrix sim. | Sequence        |
|------------------------------------|----------------|--------------|-----------|-------------|-----------------|
| Activator protein 2 alpha<br>(AP2) | 1908           | 1922         | 0.906     | 0.942       | agcGCCCcaggctcc |

**Figure S2.** Transcription factor AP-2 $\alpha$  binding sites in the core promoter of mouse miR-25-3p were predicted by AliBaba 2.1 and Genomatix softwares programs.

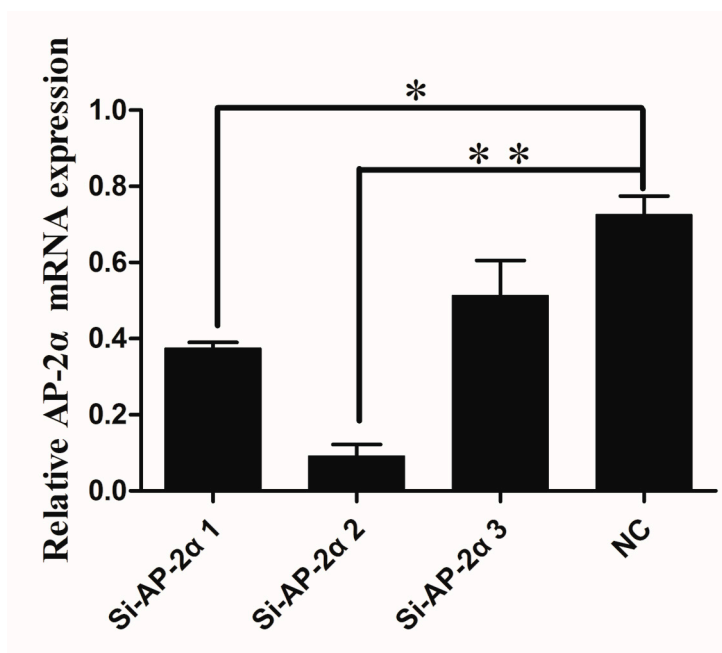

**Figure S3.** The mRNA expression of AP-2α was detected by qRT-PCR. Data were presented as means  $\pm$  SD ( $n = 3$ ), \*  $p < 0.05$ ; \*\*  $p < 0.01$ .

**Table S1.** Oligonucleotide sequences of miR-25-3p and AP-2α siRNAs.

| Name                   | Sequence (5'-3')                                     |
|------------------------|------------------------------------------------------|
| miR-25-3p mimics       | CAUUGCACUUGUCUCGGUCUGA<br>UCAGACCGAGACAAGUGCAAUG     |
| miR-25-3p NC           | UUUGUACUACACAAAAGUACUG<br>CAGUACUUUUGUGUAGUACAAA     |
| miR-25-3p inhibitor    | UCAGACCGAGACAAGUGCAAUG                               |
| miR-25-3p inhibitor-NC | CAGUACUUUUGUGUAGUACAAA                               |
| siAP-2α-1              | F: GGAGAGCGAAGUCUAAGAATT<br>R: UUCUUAGACUUCGCUCUCCTT |
| siAP-2α-2              | F: CCAAAGCAGUAGCAGAAUUTT<br>R: AAUUCUGCUACUGCUUUGGTT |
| siAP-2α-3              | F: GCAUCCUUCGAGCAAUAAATT<br>R: UUUAUUGCUCGAAGGAUGCTT |

Note: Italics bases represent protective bases.

**Table S2.** Primers for amplification of *Akt1* 3' UTR and its mutated fragment.

| Name | Primer sequence (5'-3')                    |
|------|--------------------------------------------|
| Akt1 | F: <u>GGGTTTAAACGCCAGGTCAGGAGGAAA</u> ACTA |
|      | R: <u>CCGCTCGAGCTTCTGGTGCCTTCTTGCTG</u>    |
|      | Mut-F: GACGCGACCATGCTAGTTGTGGGCTCATG       |
|      | Mut-R: CATGAGCCCACAACCTAGCATGGTCCGCTC      |

Note: Italics, protective bases; underlined, enzyme loci; shadow, mutation sites

**Table S3.** Primers for amplification of miR-25-3p promoters and AP-2α transcription factor binding sites mutated fragment.

| Name         | Primer sequence (5'-3')                                                             | Size (bp) | Tm (°C) |
|--------------|-------------------------------------------------------------------------------------|-----------|---------|
| miR-25-3p-P1 | F: <u>GGGGTACC</u> ACTGACTTTAGAGGGCGGTG<br>R: <u>CCAAGCTT</u> TGTCAGACCGAGACAAGTGC  | 2034      | 61      |
| miR-25-3p-P2 | F: <u>GGGGTACC</u> GCTTCTCGATTTCGACCTCCT<br>R: <u>CCAAGCTT</u> TGTCAGACCGAGACAAGTGC | 1779      | 60      |
| miR-25-3p-P3 | F: <u>GGGGTACC</u> GCAGACACCTTAAACACCTTCC                                           | 1623      | 60      |

|                    |                                                                                   |      |    |
|--------------------|-----------------------------------------------------------------------------------|------|----|
|                    | R: <u>CCAAGCTTTGTCAGACCGAGACAAGTGC</u>                                            |      |    |
| miR-25-3p-P4       | F: <u>GGGGTACCCATCACCTATGTCCACCAGCA</u><br>R: <u>CCAAGCTTTGTCAGACCGAGACAAGTGC</u> | 1425 | 60 |
| miR-25-3p-P5       | F: <u>GGGGTACCCCTGGGTCTCTCTGTAGCCA</u><br>R: <u>CCAAGCTTTGTCAGACCGAGACAAGTGC</u>  | 1218 | 60 |
| miR-25-3p-P6       | F: <u>GGGGTACCTTCCCGCTTTCCCATGAACC</u><br>R: <u>CCAAGCTTTGTCAGACCGAGACAAGTGC</u>  | 782  | 60 |
| miR-25-3p-P7       | F: <u>GGGGTACCTCTCCGACTTTCCACTGCTC</u><br>R: <u>CCAAGCTTTGTCAGACCGAGACAAGTGC</u>  | 602  | 59 |
| miR-25-3p-P8       | F: <u>GGGGTACCAGGCTGCTTGCTGCTTGAAT</u><br>R: <u>CCAAGCTTTGTCAGACCGAGACAAGTGC</u>  | 383  | 59 |
| miR-25-3p-P9       | F: <u>GGGGTACCCCCAGGACACAACCTCTG</u><br>R: <u>CCAAGCTTTGTCAGACCGAGACAAGTGC</u>    | 263  | 59 |
| AP-2 $\alpha$ -mut | F: TAGCTGAGCGCCCTGTACTCCATTTGTTGA<br>R: TCAAACAAATGGAGTACAGGGCGCTCAGCTA           |      |    |

Note: Italics, protective bases; underlined, enzyme loci.

**Table S4.** Primers for ChIP assays.

| Name               | Primer sequence (5'-3')                           | Size (bp) | T <sub>m</sub> (°C) |
|--------------------|---------------------------------------------------|-----------|---------------------|
| ChIP-AP-2 $\alpha$ | F: TGCTGAGCTAGCACTTCCC<br>R: CTGTCCTGTGAGGGAGACCA | 132       | 60                  |

**Table S5.** Primers for qRT-PCR.

| Primer         | Primer sequence (5'-3')                                    | Size(bp) | T <sub>m</sub> (°C) |
|----------------|------------------------------------------------------------|----------|---------------------|
| miR-25-3p Loop | CTCAACTGGTGTCTGGAGTCGGCAATTCAGTT<br>GAGTCAGACCG            | 66       | 60                  |
| miR-25-3p      | F: <b>CTGGTAGGCATTGC</b> ACTTGTCT<br>R: TCAACTGGTGTCTGGAG  |          |                     |
| U6 Loop        | CTCAACTGGTGTCTGGAGTCGGCAATTCAGTT<br>GAGAAAAATATGGAACGCT    |          |                     |
| U6             | F: <b>CTGGTAGGGTGTCTGCTTCGGCAG</b><br>R: TCAACTGGTGTCTGGAG | 150      | 60                  |
| Akt1           | F: GATGGAGGCCAGGGTACAAA<br>R: GCAGCGACACCACAAAATGA         | 176      | 59                  |
| PI3K           | F: GAAATCTCCTGGGATGTGTCGT<br>R: ATCTGGTGGCTCTCGGAGTAA      | 223      | 59                  |
| $\beta$ -actin | F: CAAGAGAGGTATCCTGACCCT<br>R: TGATCTGGGTACATCTTTTAC       | 188      | 58                  |

Note: red, loop sequences; yellow, universal sequences; bold bases, protective bases.
